# Supplementary material for: Induction of A Disintegrin and Metalloproteinase with Thrombospondin motifs 1 by a rare variant or cognitive activities reduces hippocampal amyloid-β and consequent Alzheimer’s disease risk
Source: Front Aging Neurosci. 2022 Aug 9;14:896522. doi: 10.3389/fnagi.2022.896522 (PMC9395645; doi:10.3389/fnagi.2022.896522)
Supplement: Supplementary file 1 [file Data_Sheet_1.docx]

Supplementary Material

## Supplementary Figures


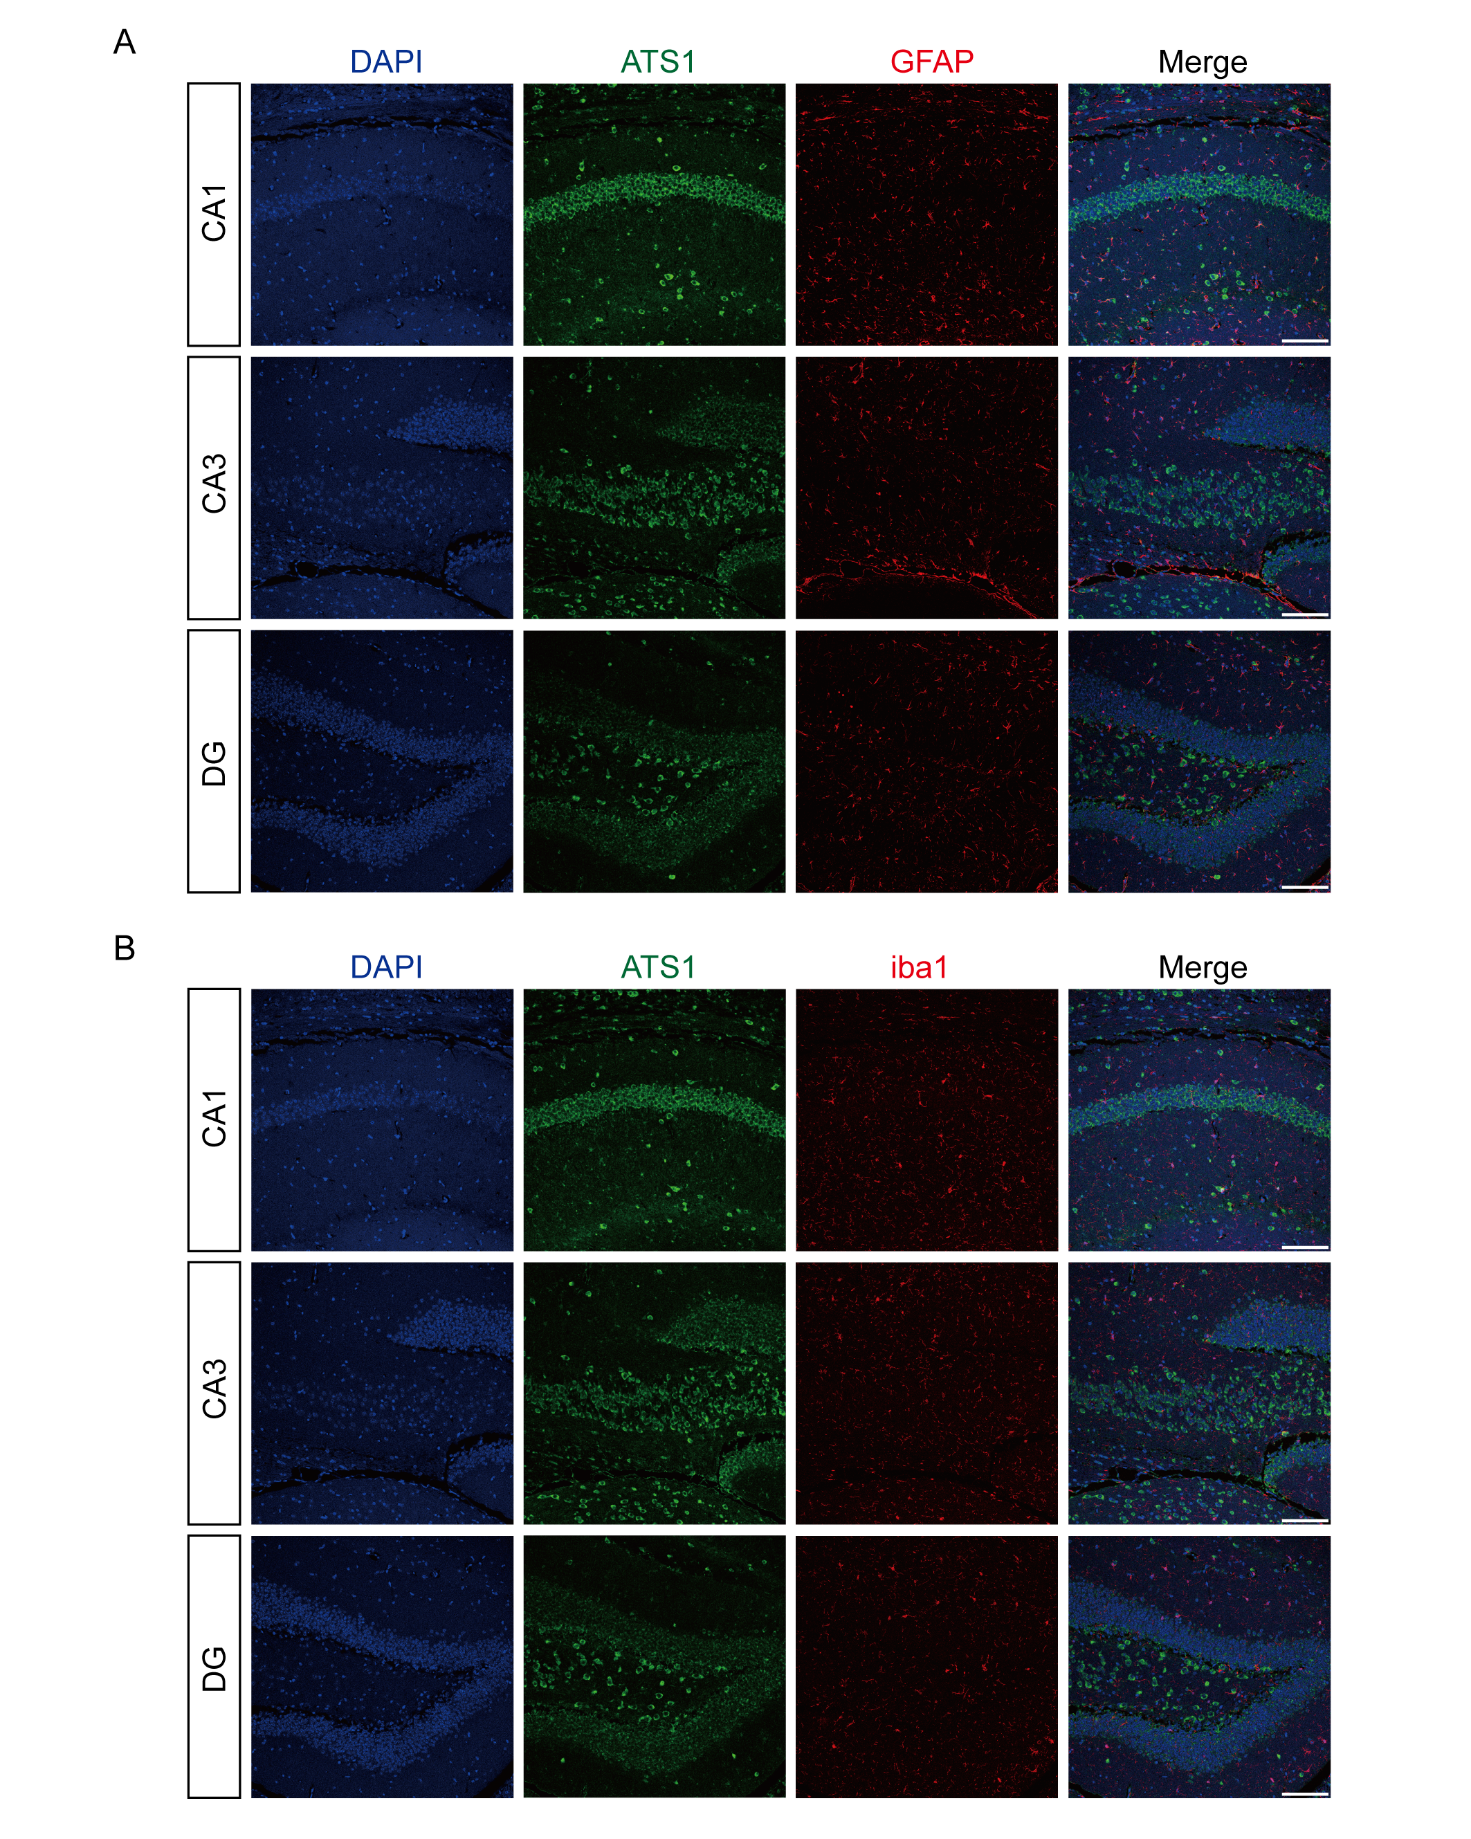


**Supplementary Figure S1.** ATS1 was rarely expressed by astrocytes or microglia. **(A, B)** Nuclei (by DAPI), ATS1 (by antibody), astrocytes (by GFAP) and microglia (by iba1) were labeled in CA1, CA3 and DG regions. Scale bars, 100 μm. ATS1, ADAMTS1; DG, dentate gyrus.


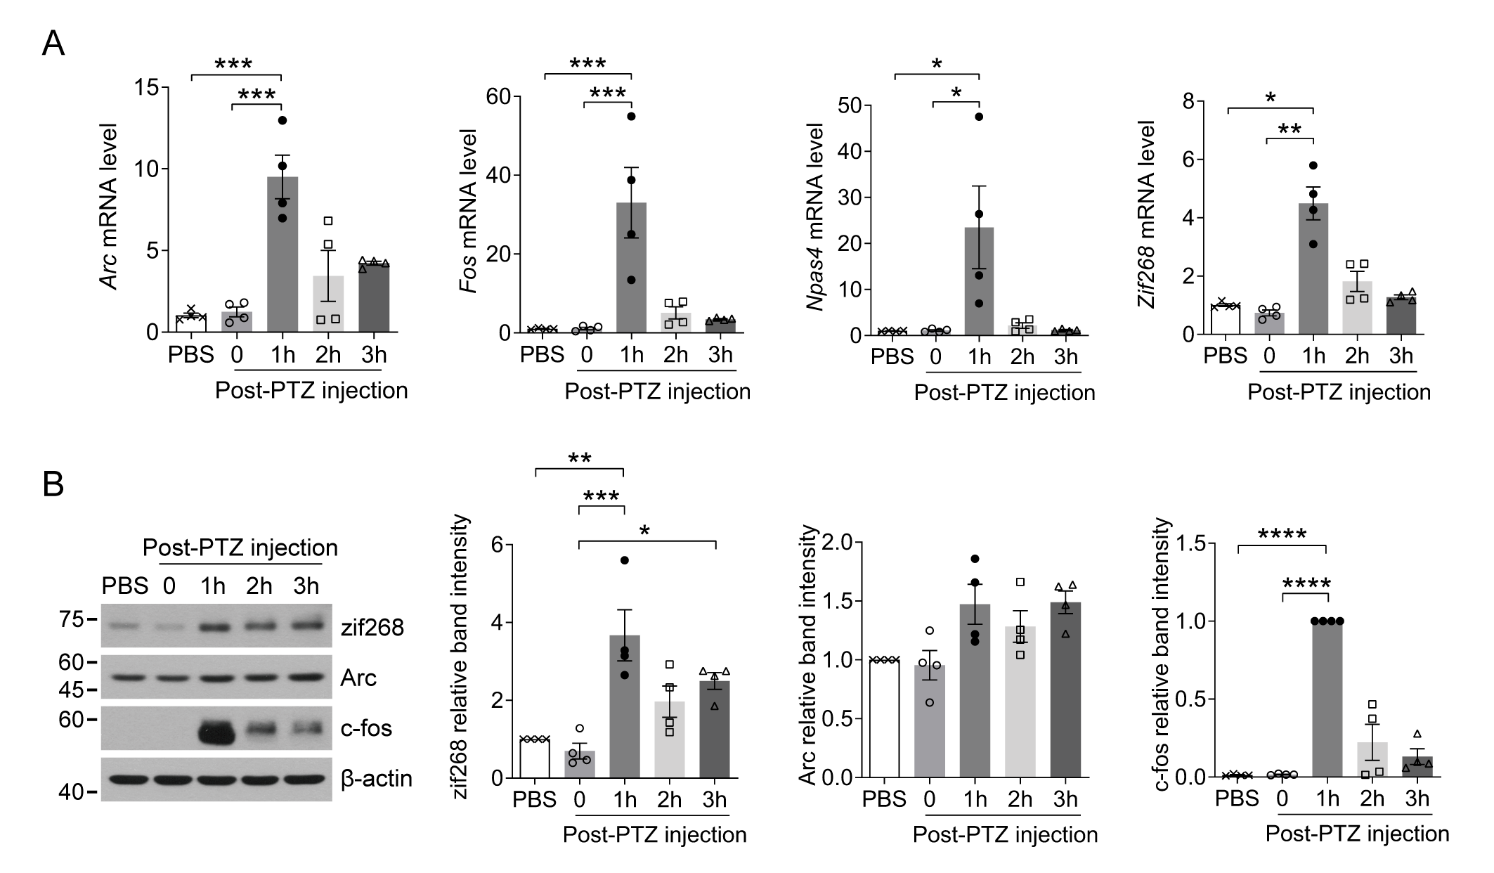


**Supplementary Figure S2.** 10-week-old WT male mice were intraperitoneally injected with PTZ to induce synaptic activation and sacrificed at different timepoints. Immediate early genes *Arc*, *Fos*, *Npas4* and *Zif268* were subsequently induced by the activation. **(A)** The relative mRNA levels of *Arc*, *Fos*, *Npas4* and *Zif268* were significantly upregulated 1 h post injection (*n* = 4; *Arc*, *P* < 0.001, 1 h vs PBS, *P* < 0.001, 1 h vs 0; *Fos*, *P* < 0.001, 1 h vs PBS, *P* < 0.001, 1 h vs 0; *Npas4*, *P* < 0.05, 1 h vs PBS, *P* < 0.05, 1 h vs 0; *Zif268*, *P* < 0.05, 1 h vs PBS, *P* < 0.01, 1 h vs 0, one-way ANOVA or Kruskal-Wallis test). **(B)** Western blot of zif268, Arc and c-fos at different timepoints. The relative band intensities showed that zif268 and c-fos were upregulated 1 h post injection (*n* = 4; zif268, *P* < 0.01, 1 h vs PBS, *P* < 0.001, 1 h vs 0, *P* < 0.05, 3 h vs 0; c-fos, *P* < 0.0001, 1 h vs PBS, *P* < 0.0001, 1 h vs 0, one-way ANOVA). **P* < 0.05, ***P* < 0.01, ****P* < 0.001, *****P* < 0.0001. Data was expressed as Mean ± SEM. PTZ, pentylenetetrazol; WT, wild type.


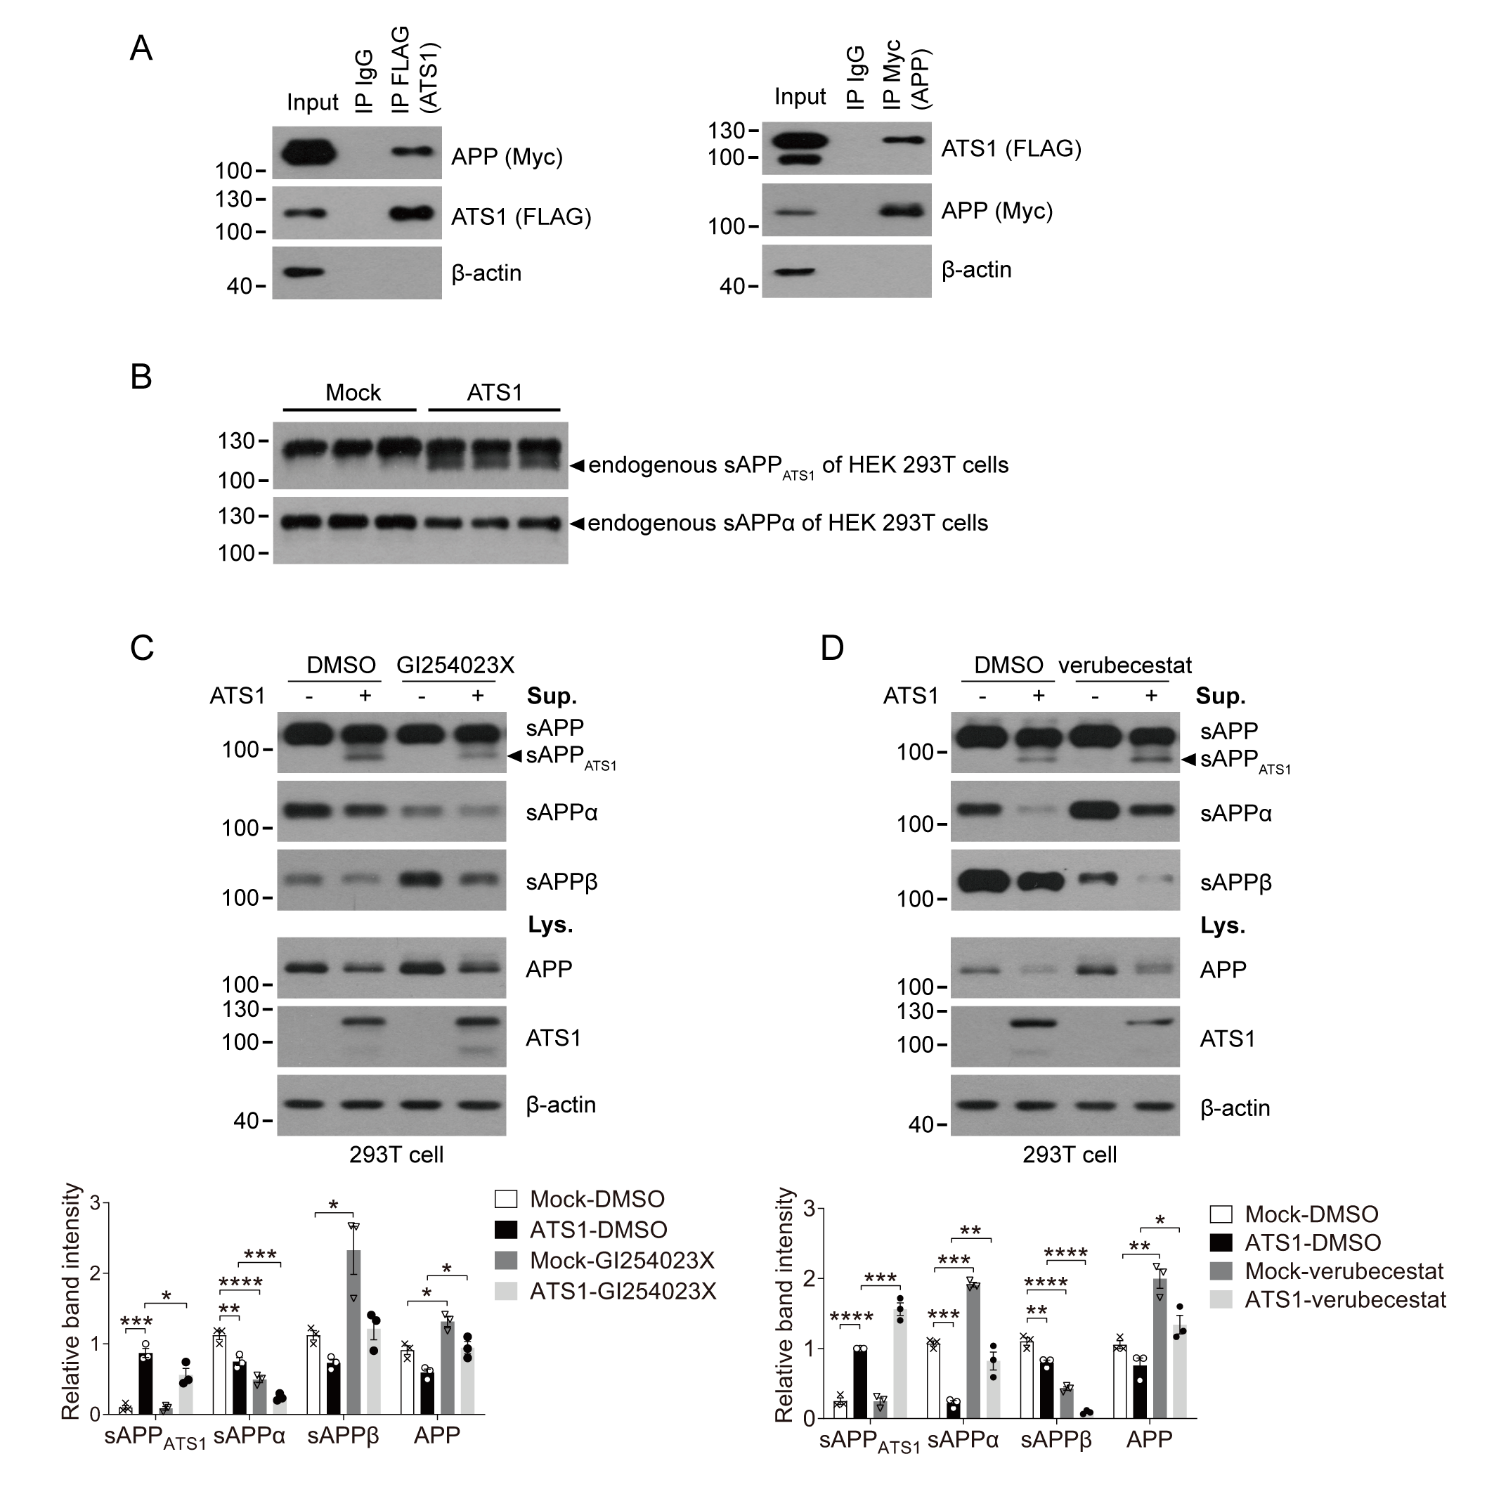


**Supplementary Figure S3.** The interaction of ATS1 and APP was blocked by the inhibitor of α-secretase while promoted by that of β-secretase.**(A)** Co-immunoprecipitation of cell lysates from HEK 293T cells transfected with *APP* and *ATS1*. Western blot showed the interaction of APP and ATS1 with both ATS1 and APP antibodies. **(B)** Western blot of soluble APP metabolites in HEK 293T cells merely transfected with *ATS1* or mock showed the molecular weight of endogenous sAPPATS1 and sAPPα which was clearly distinguished from that of products derived from primary neurons. **(C, D)** HEK 293T cells transfected with *APP* and *ATS1* were treated with ADAM10 inhibitor GI254023X (20 μM) or BACE1 inhibitor verubecestat (1 μM) for 24 h. Western blot of APP pathway proteins (sAPPATS1, sAPPα, sAPPβ and APP) was shown. The relative band intensities indicated that ATS1 activity was suppressed by **(C)** GI254023X (*n* = 3, sAPPATS1, *P* < 0.05, ATS1-GI254023X vs ATS1-DMSO, one-way ANOVA) while promoted by **(D)** verubecestat (*n* = 3, sAPPATS1, *P* < 0.001, ATS1-verubecestat vs ATS1-DMSO, one-way ANOVA). **P* < 0.05, ***P* < 0.01, ****P* < 0.001, *****P* < 0.0001. ATS1, ADAMTS1; IP, immunoprecipitation; Lys., lysates; Sup., supernatant. Mock, empty vector.
